# Supplementary material
Source: PubMed Central journal article supplement (PMC3100694)
Supplement: supp_blood-2010-10-310995_Document1.pdf [file supp_blood-2010-10-310995_Document1.pdf]

### PCR amplification of A20

The coding exons and splice sites of A20 were amplified using the primers listed in Table S1. Multiple primers flanking short (<300 bp) overlapping segments were used given the fragmented nature of formalin fixed paraffin embedded DNA. PCR was first conducted using 34 cycles. A second amplification was performed when necessary using identical primers and conditions.

**Table S1. A20 primers**

| Exon      | Primer Name                | Sequence                         |
|-----------|----------------------------|----------------------------------|
| EXON 2    | A20_E2A_F                  | 5'-GGGTAATGACAAGATGAAACAC-3'     |
|           | A20_E2A_R                  | 5'-GTTCTGAACATTTCCAGTG-3'        |
|           | A20_E2B_F                  | 5'-GATACGGGAGAGAACTCCAG-3'       |
|           | A20_E2B_R                  | 5'-AGCTTCATGAATGGGGATC-3'        |
| EXON 3    | A20_E3A_F                  | 5'-GAAAACCTTTGCTGGGTCTT-3'       |
|           | A20_E3A_R                  | 5'-CCGTTTCAACAAATTCCTGA-3'       |
|           | A20_E3B_F                  | 5'-CCACTTCTCAGTACATGTGG-3'       |
|           | A20_E3B_R                  | 5'-CCATCAGATGCTACCAGAGGGC-3'     |
| EXON 4    | A20_E4_F                   | 5'-TGACTTTTTAGTACAGGG-3'         |
|           | A20_E4_R                   | 5'-GTTTTCTCCAGGAGCCAA-3'         |
| EXON 5    | A20_E5_F                   | 5'-TTCAGCCTTATGCCTTGGCTCC-3'     |
|           | A20_E5_R                   | 5'-CCTGATGTTTCAGTGTCTAG-3'       |
| EXON 6    | A20_E6A_F                  | 5'-GGCCTTGTTTAGTAGAATAC-3'       |
|           | A20_E6A_R                  | 5'-CGGGGATTTCTATCACCATTAAG-3'    |
|           | A20_E6B_F                  | 5'-GCTGTTCCACTTGTTAACAGA-3'      |
|           | A20_E6B_R                  | 5'-CTGTTGAGCTTCAGGGTGGCA-3'      |
| EXON 7    | A20_E7A_F                  | 5'-CTAATGATGTAATAATCTTGTG-3'     |
|           | A20_E7A_R                  | 5'-GCTTTGGGAGTTTGTTTTGATTC-3'    |
|           | A20_E7B_F                  | 5'-CCAAGTCCCCTTCTTCATGTCTGT-3'   |
|           | A20_E7B_R                  | 5'-CGTTGTGGCAACGTTACAA-3'        |
|           | A20_E7C_F                  | 5'-GAGCCCTTGGCGTGAACCC-3'        |
|           | A20_E7C_R                  | 5'-GGAACGCTGGTGACAGGAAG-3'       |
|           | A20_E7D_F                  | 5'-ACTTGGATCCCAGGAAGTGCCAAGCC-3' |
|           | A20_E7D_R                  | 5'-CGATGAAACACAGTGTGCAA-3'       |
|           | A20_E7E_F                  | 5'-TGTCTCAAGCTGCACGGACTC-3'      |
| A20_E7E_R | 5'-TAGGTCCTGACAGTTCTGCC-3' |                                  |
| EXON 8    | A20_E8A_F                  | 5'-GTATCGGTGGGGTGACCCCTATGT-3'   |
|           | A20_E8A_R                  | 5'-GTTGCTCTTCTGTCCCTTTTGGCC-3'   |
|           | A20_E8B_F                  | 5'-AGGGAAAGTCAGTCCACAG-3'        |
|           | A20_E8B_R                  | 5'-TGTCGGTAGAAAACGCTCCAGC-3'     |
| EXON 9    | A20_E9A_F                  | 5'-TGCTCTCCCTAAGAAATGTG-3'       |
|           | A20_E9A_R                  | 5'-AAAATGATCACAGGCGGGGGCC-3'     |
|           | A20_E9B_F                  | 5'-AAGAACATCCTGGCCTGCCGCAGC-3'   |
|           | A20_E9B_R                  | 5'-GGATAGCACCATGATGACTG-3'       |

**Table S2. Description of A20 mutations**

| Sample ID | Diagnosis              | Mutation*     | Location | Consequence               |
|-----------|------------------------|---------------|----------|---------------------------|
| C27       | DLBCL, GCB             | G327T(E88X)   | Exon 2   | Truncated protein of 87aa |
| C35       | DLBCL, non-GCB         | A157T(K31X)   | Exon 2   | Truncated protein of 30aa |
| C79       | Plasmablastic lymphoma | G1822A(A586T) | Exon 7   | Amino acid change         |

\* Numbering according to GenBank accession No NM\_006290.2 (nucleotide changes) and NP\_006281.1 (amino acid changes, in brackets)

Abbreviations: DLBCL, diffuse large B-cell lymphoma; GCB, germinal center B-cell; aa, amino acid

**Table S3. Cases with evidence of A20 inactivation**

|    | Sample ID | Diagnosis     | FISH             | IHC | Mutation          | EBER | LMP1 |
|----|-----------|---------------|------------------|-----|-------------------|------|------|
| 1  | C83       | BCL, U        | nl               | -   | No                | +    | -    |
| 2  | C53       | BL            | nl               | -   | No                | -    | -    |
| 3  | C63       | BL            | No hybridization | -   | Not performed     | +    | -    |
| 4  | R43       | BL            | nl               | -   | Not performed     | -    | -    |
| 5  | R49       | BL            | nl               | -   | Not performed     | -    | -    |
| 6  | C27       | DLBCL GCB     | nl               | +   | STOP codon Exon 2 | -    | -    |
| 7  | C57       | DLBCL GCB     | LOH              | +   | No                | -    | -    |
| 8  | R51       | DLBCL, GCB    | No hybridization | -   | Not performed     | -    | -    |
| 9  | C05       | DLBCL non GCB | LOH              | +   | No                | -    | -    |
| 10 | C35       | DLBCL non GCB | LOH              | +   | STOP codon Exon 2 | +    | +/-  |
| 11 | C69       | PBL           | Homozygous loss  | -   | No                | +    | -    |
| 12 | C77       | PBL           | LOH              | +   | Not performed     | +    | -    |
| 13 | C79       | PBL           | LOH              | +   | Ala to Thr Exon 7 | +    | -    |

Abbreviations: BCL, U, B-cell lymphoma, unclassifiable, intermediate between Burkitt lymphoma and DLBCL; BL, Burkitt lymphoma; PBL, plasmablastic lymphoma; nl, normal; LOH, loss of heterozygosity; ICH, immunohistochemistry; EBER, Epstein-Barr virus encoded RNA; LMP-1, latent membrane protein-1, +/-, intermediate LMP1 expression (<10%)
